# Supplementary material for: Human Genomic Deletions Generated by SVA-Associated Events
Source: Comp Funct Genomics. 2012 May 20;2012:807270. doi: 10.1155/2012/807270 (PMC3362811; doi:10.1155/2012/807270)
Supplement: Supplementary file 1 — The sequences of the oligonucleotide primers, annealing temperatures, and PCR product sizes are summarized. [file 807270.f1.xlsx]

## Sheet: Sheet1
Table S1. Oligonucleotide primer information for 11 putative SAD candidates
#	Locus	Forward primer (5' -> 3')	Reverse primer (5' -> 3')	A.T.	Human	Chimp
1	87	GCCTAACTTTTCTCCGAAAGACCT	TTTAATACTCTCAATTGTTGCT	55	2516	3711
2	273	CCAGCAAAATGTAGCCATAATCA	CTATGATAAATGAAATAAGCCAGG	60	1784	2503
3	361	GATCTAATCAGGTGATGAGCT	CCTGCTGCACCCAGAACAG	60	1088	5990
	361_int	AAGGCCACATTCACCTGAAGAG	CCTGCTGCACCCAGAACAG	60	x	523
	361_seq	CATCATGGCCCGCTCTCAATG	TCGGCTCGCTACAACCTCC	-	-	-
4	432	AGTCCCCATTCTGGCTCCC	TGGCGTTGGGAGGCCACCAGT	60	691	975
5	689	CTGGATTGTGTAGGCATGCT	CCAGTAAGAAGACCACATCT	60	2482	6670
	689_int	AGAGAAAGGGCTCCAGAGAC	CCAGTAAGAAGACCACATCT	60	x	1448
6	1505	AATACGAAGGAAGGCAGGA	TGTGAGCATAAAGTAACATC	55	1195	2522
7	1652	AGAGGACAGTTGCACAGA	CTGAGTCCAACTCTGCTTCT	55	2909	3129
8	2299	CACAGAGCTCCTCATTAGCC	CCACCTCGCTGTGACCTTG	61	2717	3232
9	2493	AGCCTGGTGGTGATGAAATC	CAGAGTGCCTCATCTCCTAC	60	900	1483
10	2836	GTCCTAGCATTCTCCAACTCT	TGGGCTTCCCAGTTGCTGAT	60	1721	2068
11	2981	TGATTCAAAGAACACCGTCAA	TGGAAGAGCTTCTTGGCACT	60	1140	1999
Seq - sequencing oligomers
int - internal primers
